# Supplementary material
Source: PubMed Central journal article supplement (PMC2939250)

**A**

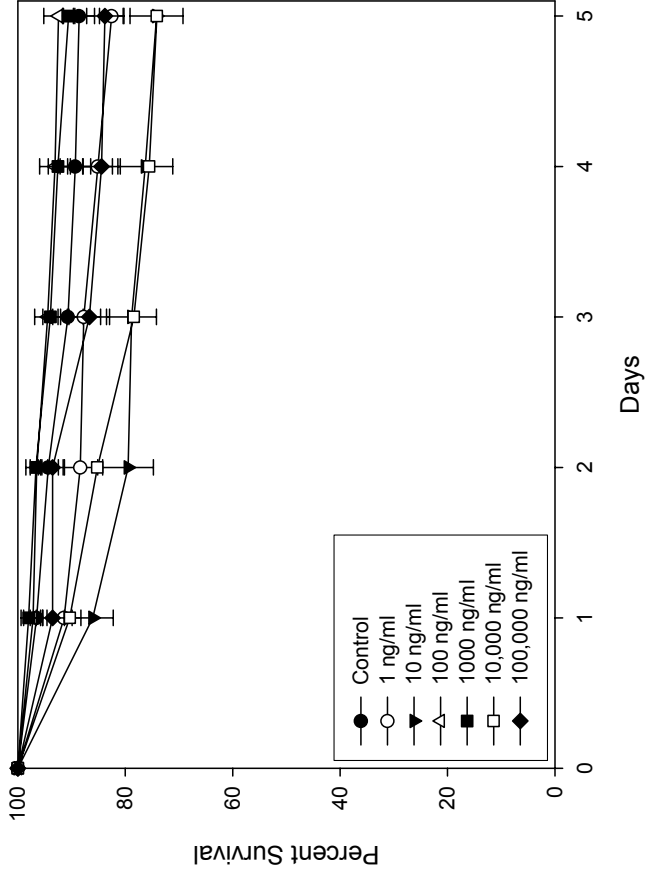

**B**

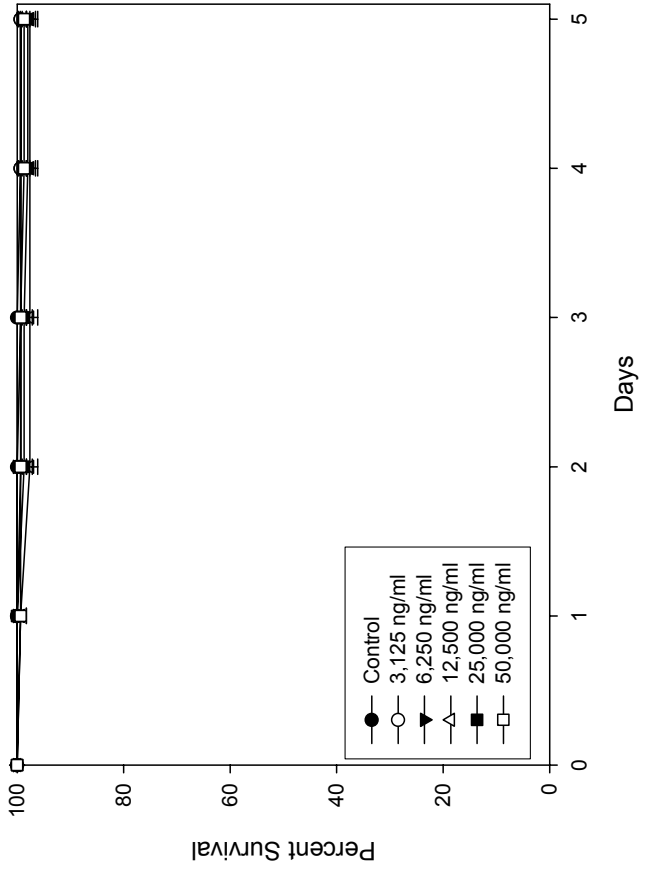

Supplement: NIHMS219606-supplement-01.pdf [file NIHMS219606-supplement-01.pdf]

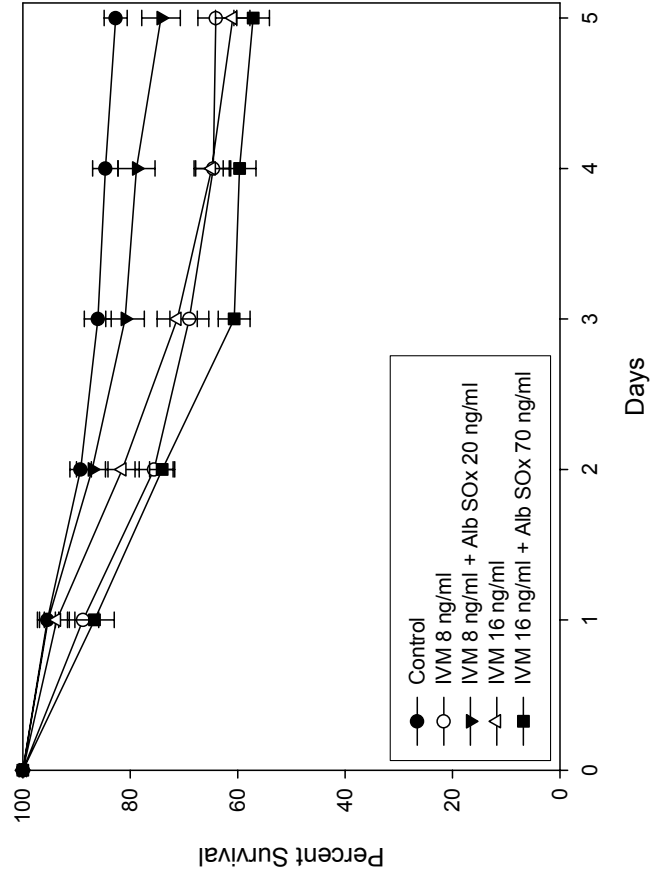

Supplement: NIHMS219606-supplement-04.pdf [file NIHMS219606-supplement-04.pdf]

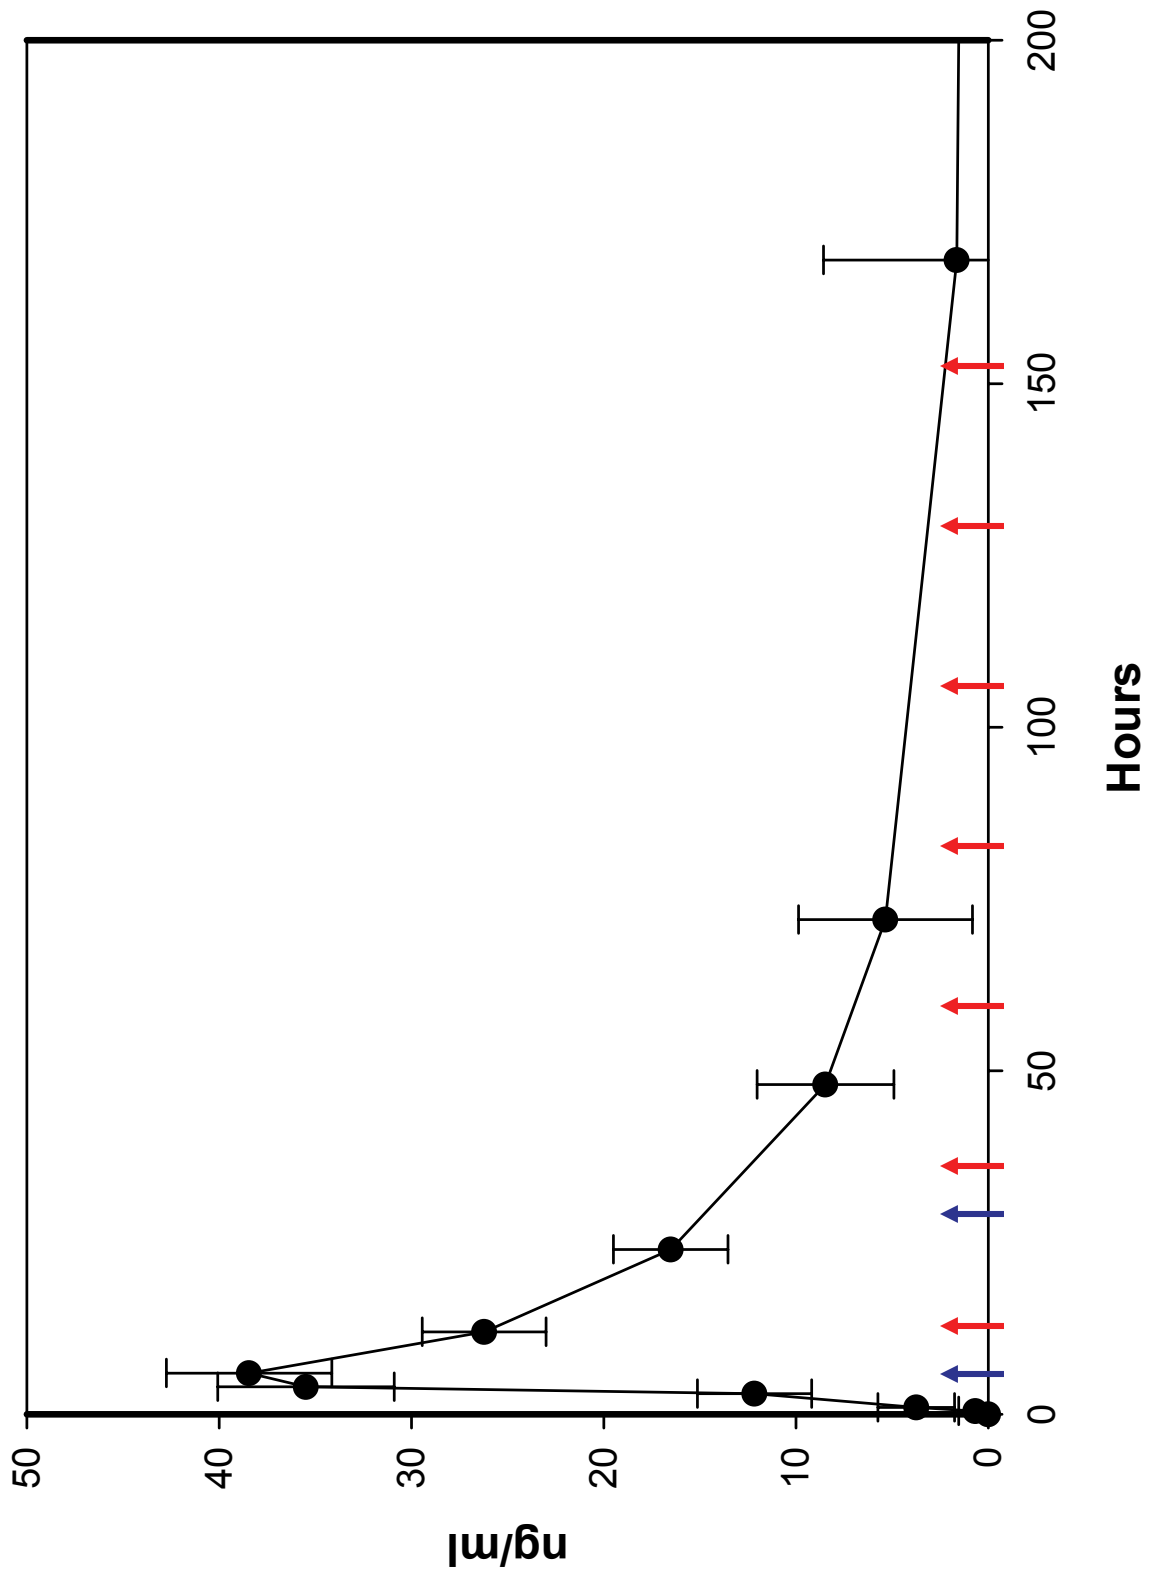

Supplement: NIHMS219606-supplement-05.pdf [file NIHMS219606-supplement-05.pdf]
